# Supplementary material
Source: PubMed Central journal article supplement (PMC4416947)
Supplement: NIHMS642064-supplement-3.pdf [file NIHMS642064-supplement-3.pdf]

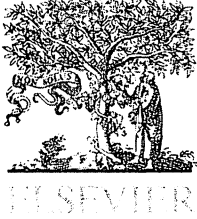

***Neurotoxicology and Teratology***  
**Conflict of Interest Policy**

Manuscript number (if applicable): NTT -14-48R1

Article Title: Low-dose paroxetine exposure causes lifetime declines in male mouse body weight, reproduction and competitive ability as measured by the novel organismal performance assay

Author name: Shannon Gaukler

**Declarations**

*Neurotoxicology and Teratology* requires that all authors sign a declaration of conflicting interests. If you have nothing to declare in any of these categories then this should be stated.

**Conflict of Interest**

A conflicting interest exists when professional judgement concerning a primary interest (such as patient's welfare or the validity of research) may be influenced by a secondary interest (such as financial gain or personal rivalry). It may arise for the authors when they have financial interest that may influence their interpretation of their results or those of others. Examples of potential conflicts of interest include employment, consultancies, stock ownership, honoraria, paid expert testimony, patent applications/registrations, and grants or other funding.

**Please state any competing interests**

No conflict of interest to declare.

**Funding Source**

All sources of funding should also be acknowledged and you should declare any involvement of study sponsors in the study design; collection, analysis and interpretation of data; the writing of the manuscript; the decision to submit the manuscript for publication. If the study sponsors had no such involvement, this should be stated.

**Please state any sources of funding for your research**

The project was funded by the University of Utah's Technology Commercialization Program and was partially conducted while Wayne Potts was supported by NSF grant DEB 09-18969 and NIH grant R01-GM109500. Shannon Gaukler was supported by an NSF GK-12 Educational Outreach Fellowship (DGE 08-41233).

**Signature** (a scanned signature is acceptable, but each author must sign)

**Print name**

Shannon Gaukler

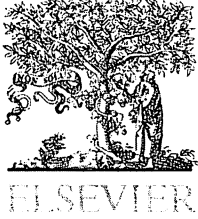

***Neurotoxicology and Teratology***  
**Conflict of Interest Policy**

Manuscript number (if applicable): NTT-14-48R1

Article Title: Low-dose paroxetine exposure causes lifetime declines in male mouse body weight, reproduction and competitive ability as measured by the novel organismal performance assay

Author name: James Ruff

**Declarations**

*Neurotoxicology and Teratology* requires that all authors sign a declaration of conflicting interests. If you have nothing to declare in any of these categories then this should be stated.

**Conflict of Interest**

A conflicting interest exists when professional judgement concerning a primary interest (such as patient's welfare or the validity of research) may be influenced by a secondary interest (such as financial gain or personal rivalry). It may arise for the authors when they have financial interest that may influence their interpretation of their results or those of others. Examples of potential conflicts of interest include employment, consultancies, stock ownership, honoraria, paid expert testimony, patent applications/registrations, and grants or other funding.

**Please state any competing interests**

No conflict of interest to declare.

**Funding Source**

All sources of funding should also be acknowledged and you should declare any involvement of study sponsors in the study design; collection, analysis and interpretation of data; the writing of the manuscript; the decision to submit the manuscript for publication. If the study sponsors had no such involvement, this should be stated.

**Please state any sources of funding for your research**

The project was funded by the University of Utah's Technology Commercialization Program and was partially conducted while Wayne Potts was supported by NSF grant DEB 09-18969 and NIH grant R01-GM109500. Shannon Gaukler was supported by an NSF GK-12 Educational Outreach Fellowship (DGE 08-41233).

**Signature** (a scanned signature is acceptable, but each author must sign)

**Print name**

James S. Ruff

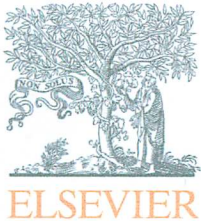

***Neurotoxicology and Teratology***  
**Conflict of Interest Policy**

Manuscript number (if applicable): NTT -14-48R1

Article Title: Low-dose paroxetine exposure causes lifetime declines in male mouse body weight, reproduction and competitive ability as measured by the novel organismal performance assay

Author name:

Tessa Galland

**Declarations**

***Neurotoxicology and Teratology*** requires that all authors sign a declaration of conflicting interests. If you have nothing to declare in any of these categories then this should be stated.

**Conflict of Interest**

A conflicting interest exists when professional judgement concerning a primary interest (such as patient's welfare or the validity of research) may be influenced by a secondary interest (such as financial gain or personal rivalry). It may arise for the authors when they have financial interest that may influence their interpretation of their results or those of others. Examples of potential conflicts of interest include employment, consultancies, stock ownership, honoraria, paid expert testimony, patent applications/registrations, and grants or other funding.

**Please state any competing interests**

No conflict of interest to declare.

**Funding Source**

All sources of funding should also be acknowledged and you should declare any involvement of study sponsors in the study design; collection, analysis and interpretation of data; the writing of the manuscript; the decision to submit the manuscript for publication. If the study sponsors had no such involvement, this should be stated.

**Please state any sources of funding for your research**

The project was funded by the University of Utah's Technology Commercialization Program and was partially conducted while Wayne Potts was supported by NSF grant DEB 09-18969 and NIH grant R01-GM109500. Shannon Gaukler was supported by an NSF GK-12 Educational Outreach Fellowship (DGE 08-41233).

**Signature** (a scanned signature is acceptable, but each author must sign)

**Print name**

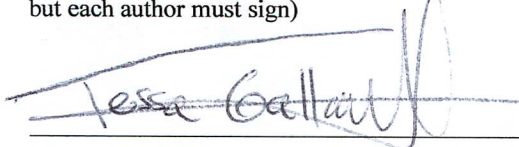

Tessa Galland

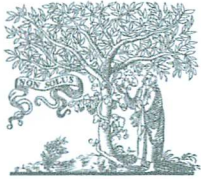

ELSEVIER

***Neurotoxicology and Teratology***  
**Conflict of Interest Policy**

Manuscript number (if applicable): NTT -14-48R1

Article Title: Low-dose paroxetine exposure causes lifetime declines in male mouse body weight, reproduction and competitive ability as measured by the novel organismal performance assay

Author name: Kirstie Kandaris

**Declarations**

*Neurotoxicology and Teratology* requires that all authors sign a declaration of conflicting interests. If you have nothing to declare in any of these categories then this should be stated.

**Conflict of Interest**

A conflicting interest exists when professional judgement concerning a primary interest (such as patient's welfare or the validity of research) may be influenced by a secondary interest (such as financial gain or personal rivalry). It may arise for the authors when they have financial interest that may influence their interpretation of their results or those of others. Examples of potential conflicts of interest include employment, consultancies, stock ownership, honoraria, paid expert testimony, patent applications/registrations, and grants or other funding.

**Please state any competing interests**

No conflict of interest to declare.

**Funding Source**

All sources of funding should also be acknowledged and you should declare any involvement of study sponsors in the study design; collection, analysis and interpretation of data; the writing of the manuscript; the decision to submit the manuscript for publication. If the study sponsors had no such involvement, this should be stated.

**Please state any sources of funding for your research**

The project was funded by the University of Utah's Technology Commercialization Program and was partially conducted while Wayne Potts was supported by NSF grant DEB 09-18969 and NIH grant R01-GM109500. Shannon Gaukler was supported by an NSF GK-12 Educational Outreach Fellowship (DGE 08-41233).

**Signature** (a scanned signature is acceptable, but each author must sign)

**Print name**

Kirstie Kandaris

Kirstie Kandaris

## Neurotoxicology and Teratology

### Conflict of Interest Policy

Manuscript number (if applicable): NTT -14-48R1

Article Title: Low-dose paroxetine exposure causes lifetime declines in male mouse body weight, reproduction and competitive ability as measured by the novel organismal performance assay

Author name:  
Tristan Underwood

#### Declarations

*Neurotoxicology and Teratology* requires that all authors sign a declaration of conflicting interests. If you have nothing to declare in any of these categories then this should be stated.

#### Conflict of Interest

A conflicting interest exists when professional judgement concerning a primary interest (such as patient's welfare or the validity of research) may be influenced by a secondary interest (such as financial gain or personal rivalry). It may arise for the authors when they have financial interest that may influence their interpretation of their results or those of others. Examples of potential conflicts of interest include employment, consultancies, stock ownership, honoraria, paid expert testimony, patent applications/registrations, and grants or other funding.

#### Please state any competing interests

No conflict of interest to declare.

#### Funding Source

All sources of funding should also be acknowledged and you should declare any involvement of study sponsors in the study design; collection, analysis and interpretation of data; the writing of the manuscript; the decision to submit the manuscript for publication. If the study sponsors had no such involvement, this should be stated.

#### Please state any sources of funding for your research

The project was funded by the University of Utah's Technology Commercialization Program and was partially conducted while Wayne Potts was supported by NSF grant DEB 09-18969 and NIH grant R01-GM109500. Shannon Gaukler was supported by an NSF GK-12 Educational Outreach Fellowship (DGE 08-41233).

Signature (a scanned signature is acceptable, but each author must sign)

Print name

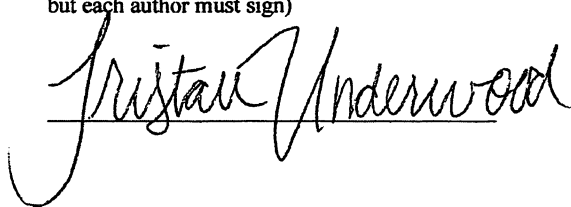

Tristan Underwood

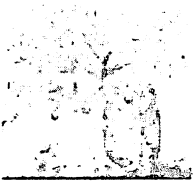

**Neurotoxicology and Teratology**  
**Conflict of Interest Policy**

Manuscript number (if applicable): NNT-17-0183d  
Article Title: Low-dose prenatal exposure to an avian influenza declines in utero mouse body weight, reproduction and competitive ability as measured by the number of offspring per litter per mouse

Author name:  
Nicole Liu

**Declarations**

*Neurotoxicology and Teratology* requires that all authors sign a declaration of conflicting interests. If you have nothing to declare in any of these categories then this should be stated.

**Conflict of Interest**

A conflicting interest exists when professional judgement concerning a primary interest (such as patient's welfare or the validity of research) may be influenced by a secondary interest (such as financial gain or personal rivalry). It may arise for the authors when they have financial interest that may influence their interpretation of their results or those of others. Examples of potential conflicts of interest include employment, consultancies, stock ownership, honoraria, paid expert testimony, patent applications/registrations, and grants or other funding.

**Please state any competing interests**

No conflict of interest to declare.

**Funding Source**

All sources of funding should also be acknowledged and you should declare any involvement of study sponsors in the study design; collection, analysis and interpretation of data; the writing of the manuscript; the decision to submit the manuscript for publication. If the study sponsors had no such involvement, this should be stated.

**Please state any sources of funding for your research**

The project was funded by the University of Utah's Technology Commercialization Program and was partially conducted while Wayne Potts was supported by NSF grant DEB 09-18969 and NIH grant R01-GM109500. Shannon Gaukler was supported by an NSF GK-12 Educational Outreach Fellowship (DGE 08-41233).

**Signature** (a scanned signature is acceptable, but each author must sign)

**Print name**

*Nicole Liu*

Nicole Liu

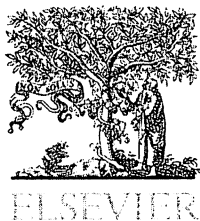

***Neurotoxicology and Teratology***  
**Conflict of Interest Policy**

Manuscript number (if applicable): NTT-14-48R1

Article Title: Low-dose paroxetine exposure causes lifetime declines in male mouse body weight, reproduction and competitive ability as measured by the novel organismal performance assay

Author name: Elizabeth Young

**Declarations**

*Neurotoxicology and Teratology* requires that all authors sign a declaration of conflicting interests. If you have nothing to declare in any of these categories then this should be stated.

**Conflict of Interest**

A conflicting interest exists when professional judgement concerning a primary interest (such as patient's welfare or the validity of research) may be influenced by a secondary interest (such as financial gain or personal rivalry). It may arise for the authors when they have financial interest that may influence their interpretation of their results or those of others. Examples of potential conflicts of interest include employment, consultancies, stock ownership, honoraria, paid expert testimony, patent applications/registrations, and grants or other funding.

**Please state any competing interests**

No conflict of interest to declare.

**Funding Source**

All sources of funding should also be acknowledged and you should declare any involvement of study sponsors in the study design; collection, analysis and interpretation of data; the writing of the manuscript; the decision to submit the manuscript for publication. If the study sponsors had no such involvement, this should be stated.

**Please state any sources of funding for your research**

The project was funded by the University of Utah's Technology Commercialization Program and was partially conducted while Wayne Potts was supported by NSF grant DEB 09-18969 and NIH grant R01-GM109500. Shannon Gaukler was supported by an NSF GK-12 Educational Outreach Fellowship (DGE 08-41233).

**Signature** (a scanned signature is acceptable, but each author must sign)

**Print name**

*Elizabeth Leigh Young*

Elizabeth Leigh Young

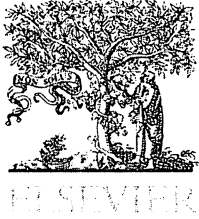

***Neurotoxicology and Teratology***  
**Conflict of Interest Policy**

Manuscript number (if applicable): NTT-14-48R1

Article Title: Low-dose paroxetine exposure causes lifetime declines in male mouse body weight, reproduction and competitive ability as measured by the novel organismal performance assay

Author name: Linda Morrison

**Declarations**

*Neurotoxicology and Teratology* requires that all authors sign a declaration of conflicting interests. If you have nothing to declare in any of these categories then this should be stated.

**Conflict of Interest**

A conflicting interest exists when professional judgement concerning a primary interest (such as patient's welfare or the validity of research) may be influenced by a secondary interest (such as financial gain or personal rivalry). It may arise for the authors when they have financial interest that may influence their interpretation of their results or those of others. Examples of potential conflicts of interest include employment, consultancies, stock ownership, honoraria, paid expert testimony, patent applications/registrations, and grants or other funding.

**Please state any competing interests**

No conflict of interest to declare.

**Funding Source**

All sources of funding should also be acknowledged and you should declare any involvement of study sponsors in the study design; collection, analysis and interpretation of data; the writing of the manuscript; the decision to submit the manuscript for publication. If the study sponsors had no such involvement, this should be stated.

**Please state any sources of funding for your research**

The project was funded by the University of Utah's Technology Commercialization Program and was partially conducted while Wayne Potts was supported by NSF grant DEB 09-18969 and NIH grant R01-GM109500. Shannon Gaukler was supported by an NSF GK-12 Educational Outreach Fellowship (DGE 08-41233).

**Signature** (a scanned signature is acceptable, but each author must sign)

**Print name**

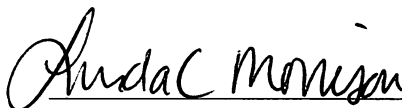  
\_\_\_\_\_

Linda C. Morrison



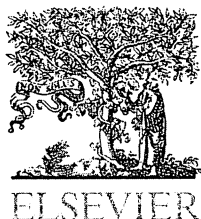

***Neurotoxicology and Teratology***  
**Conflict of Interest Policy**

Manuscript number (if applicable): NTT-14-48R1

Article Title: Low-dose paroxetine exposure causes lifetime declines in male mouse body weight, reproduction and competitive ability as measured by the novel organismal performance assay

Author name: Wayne Potts

**Declarations**

*Neurotoxicology and Teratology* requires that all authors sign a declaration of conflicting interests. If you have nothing to declare in any of these categories then this should be stated.

**Conflict of Interest**

A conflicting interest exists when professional judgement concerning a primary interest (such as patient's welfare or the validity of research) may be influenced by a secondary interest (such as financial gain or personal rivalry). It may arise for the authors when they have financial interest that may influence their interpretation of their results or those of others. Examples of potential conflicts of interest include employment, consultancies, stock ownership, honoraria, paid expert testimony, patent applications/registrations, and grants or other funding.

**Please state any competing interests**

No conflict of interest to declare.

**Funding Source**

All sources of funding should also be acknowledged and you should declare any involvement of study sponsors in the study design; collection, analysis and interpretation of data; the writing of the manuscript; the decision to submit the manuscript for publication. If the study sponsors had no such involvement, this should be stated.

**Please state any sources of funding for your research**

The project was funded by the University of Utah's Technology Commercialization Program and was partially conducted while Wayne Potts was supported by NSF grant DEB 09-18969 and NIH grant R01-GM109500. Shannon Gaukler was supported by an NSF GK-12 Educational Outreach Fellowship (DGE 08-41233).

**Signature** (a scanned signature is acceptable, but each author must sign)

**Print name**

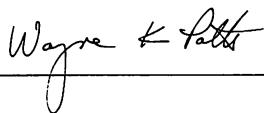  
\_\_\_\_\_

  
\_\_\_\_\_
